# Supplementary material
Source: publisher figshare collection journal article supplement (https://tandf.figshare.com/ndownloader/files/15471716)
Supplement: Supplementary file 1 [file 15471716]

**Code Sheet**

**Latino Organization Websites – Visual Analysis of Culture-Specific and Multi-cultural Images**

Coder ID _______________ Date Screen-Captured ________________

Sample ID# _____________ URL _______________________________

**For references to visuals, use the flagged images in the following sources or collected in the visual dictionary created for the study based on Kim, etc.:**

- Bailey, G. A. (2004). *The art of colonial Latin America*. New York: Phaidon. and Scott, J. F. (2008). *Latin American art: Ancient to modern.* Gainesville, FL: University Press of Florida.
- For architecture (possibly Mexican) visit <https://www.mna.inah.gob.mx/> for references.

**CATEGORY 1 (Non-photo content) Cultural Orientation of Logos, Names, and Slogans (RQs #1 & 2) & Content (RQs 1 & 5)**

**LOGO**

YES NO Indigenous symbol with name

YES NO Colonial (Spanish) symbol with name

YES NO US symbol (flag, monument) with name

YES NO Symbol w/no cultural reference (stylized people, building, etc.)

YES NO Can’t identify symbol with name

YES NO Name of organization in Spanish or Portuguese only

YES NO Name of organization in English only

YES NO Name of organization bilingual

**Organization Slogan**

YES NO Slogan is Latino/a or Hispanic-oriented

YES NO Slogan is multi-cultural oriented

YES NO Slogan is assimilation-oriented

**Languages Represented on Homepage Graphics/Text (not masthead)**

_____ Total Number of Languages

_____ English

_____ Spanish

_____ Portuguese

_____ Other(s) ___________________________________________________________________

**Non-photo Images**

_____Total number of acculturation images

_____Total number of resistance/immigrant advocacy images

_____Total number of images depicting TRADITIONAL CULTURAL SYMBOLS (ex. a sundial)

_____Total number of images depicting EMERGENT CULTURAL SYMBOLS (ex. Latino Power Graffiti art)

**Languages Represented on Homepage Graphics/Text (not masthead)**

_____ Total Number of Languages

_____ English

_____ Spanish

_____ Portuguese

_____ Other(s) ___________________________________________________________________

**CATEGORY 2 - Photos only - Cultural Orientation of Photography  (RQs #2, 3, 4)**

_____Total number of photographs

_____ Total number of photos without people (buildings, plants, art, guitar, animals, books, etc.)

_____Total number of photos with at least one person

**Acculturation/Integration Themes of photos (each photo can only go in one category)**

_____ Number of photos whose main message is WORK/WORKING

_____ Number of photos whose main message is EDUCATION

_____ Number of photos whose main message is CITIZENSHIP (voting, civic engagement, etc.)

_____ Number of photos whose main message is LEADERSHIP (business leadership, political leadership)

_____ Number of photos whose main message is FAMILY (healthy families, happy families, etc.)

**Latino Threats/Pluralism Themes of photos**

_____ Number of photos whose main message deals with CULTURAL IDENTITY, PRIDE, EMPOWERMENT

**Latino Threat Themes of photos**

_____ Number of photos whose main message is PROTEST, MARCHES, or STRIKES

_____ Number of photos dealing with ILLEGAL/CRIMINAL THEMES

**CODER NOTES**:

Table 3

Intercoder reliability for all variables

| Variable Type | Variable | Percent Agreement | Krippendorff's *Alpha* |
| --- | --- | --- | --- |
| Logos | Pre-Colombian | 100 | 1.000 |
|  | Colonial | 100 | 1.000 |
|  | US Symbol | 93.75 | 0.000 |
|  | No Symbol | 93.75 | 0.866 |
|  | Unclear Symbol | 100 | 1.000 |
| Slogans | Slogan (Y/N) | 100 | 1.000 |
|  | Slogan - Multi-cultural | 100 | 1.000 |
|  | Slogan - Acculturation | 100 | 1.000 |
|  | Slogan – Pluralism | 93.75 | 0.850 |
| Graphics (webpage body) | Non-photo image - Acculturation | 100 | 1.000 |
|  | Non-photo image –Pluralism | 100 | 1.000 |
|  | Non-photo image – Traditional | 100 | 1.000 |
|  | Non-photo image - New/emerging | 100 | 1.000 |
|  | Other | 100 | 1.000 |
| Language | Lang - Total | 100 | 1.000 |
|  | Lang - English | 100 | 1.000 |
|  | Lang - Spanish | 100 | 1.000 |
|  | Lang - Portuguese | 100 | 1.000 |
|  | Lang - Other | 100 | 1.000 |
| Photos | Photos - Total | 93.75 | 0.930 |
|  | Photos - No Humans | 93.75 | 0.812 |
|  | Photos -Humans | 87.5 | 0.856 |
|  | Photos - Acculturation - Work | 100 | 1.000 |
|  | Photos - Acculturation - Education | 93.75 | 0.913 |
|  | Photos - Acculturation - Citizenship | 93.75 | 0.000 |
|  | Photos - Acculturation - Leadership | 100 | 1.000 |
|  | Photos - Acculturation - Family | 93.75 | 0.886 |
|  | Photos - Pluralism - Empowerment | 100 | 1.000 |
|  | Photos – Pluralism - Resistance – Protest  Photos – Pluralism – Resistance - Illegal | 100  100 | 1.000  1.000 |


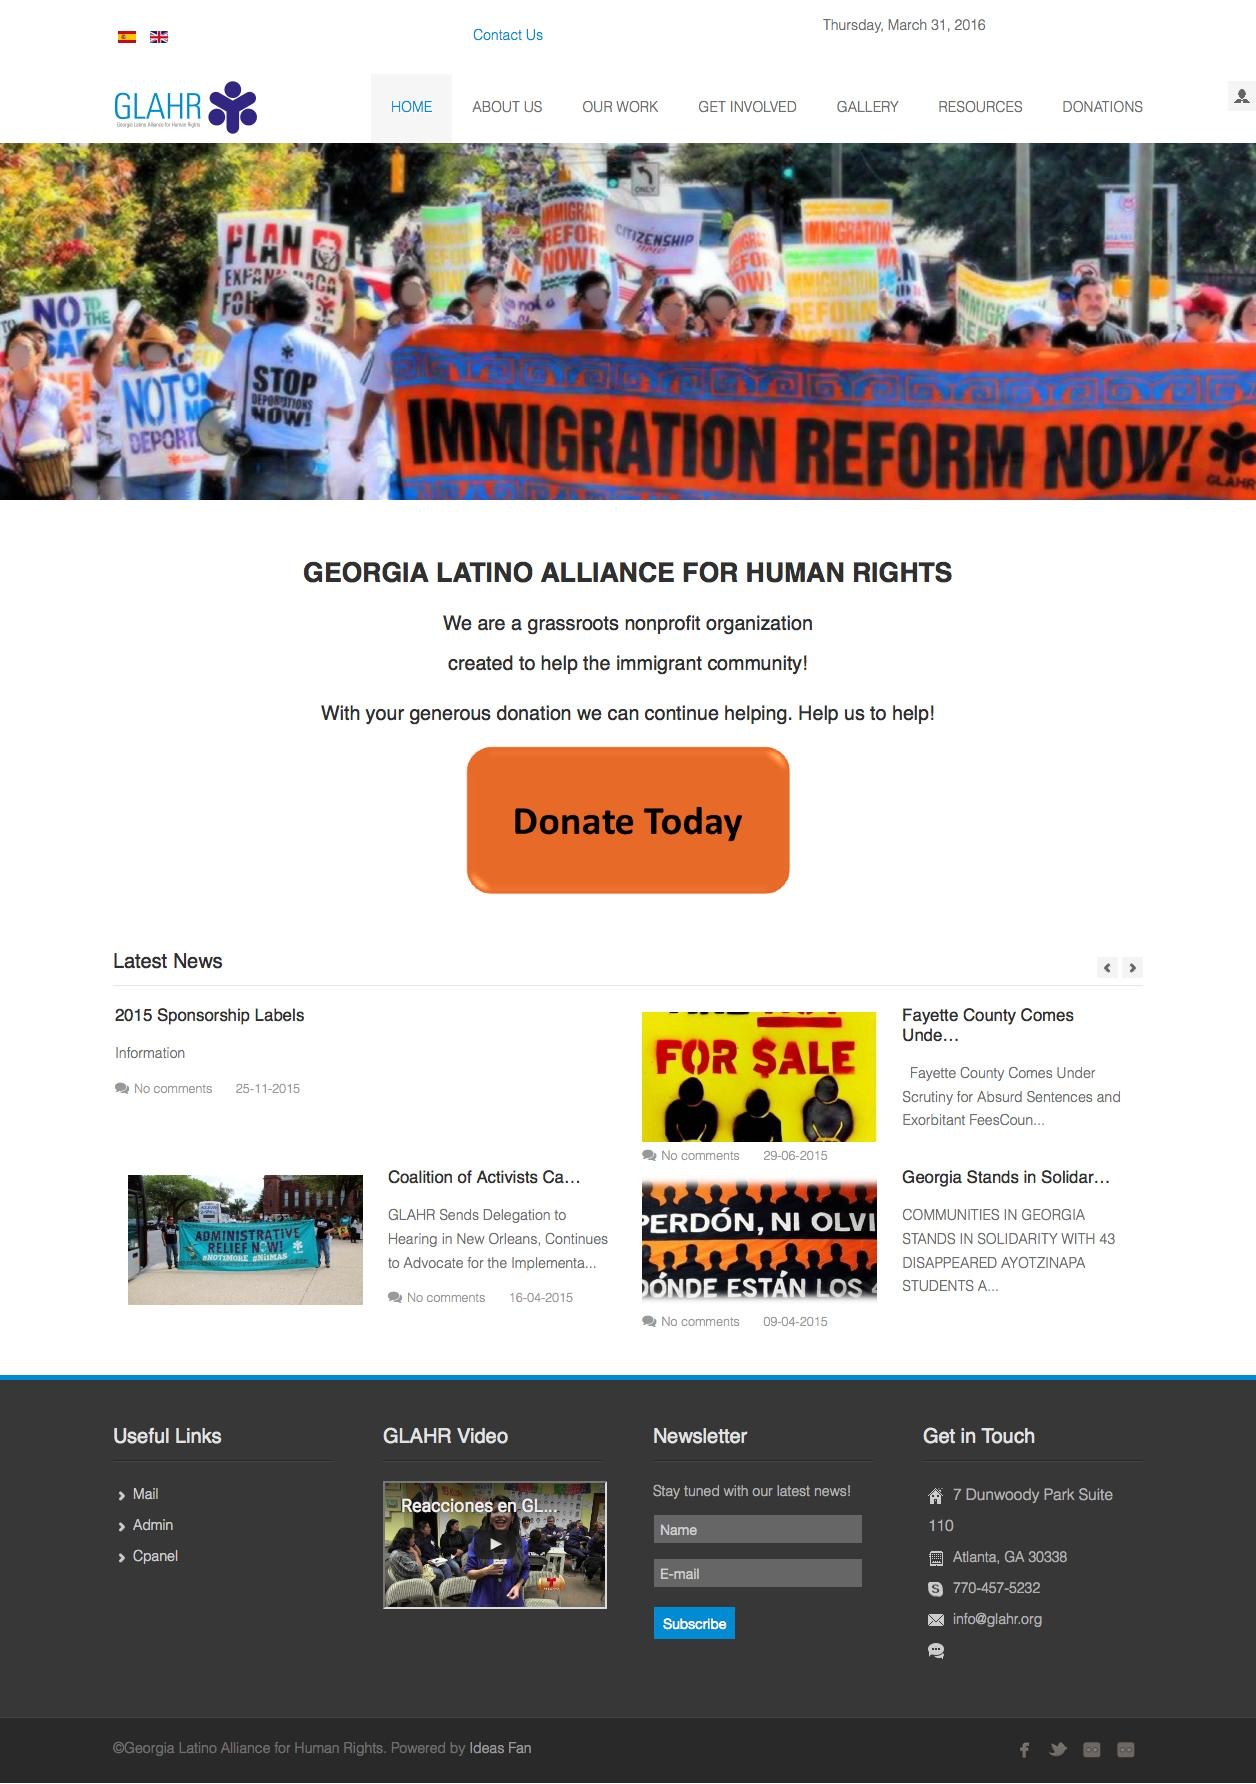


Pluralism-Resistance-Protest category, Georgia Latino Alliance for Human Rights


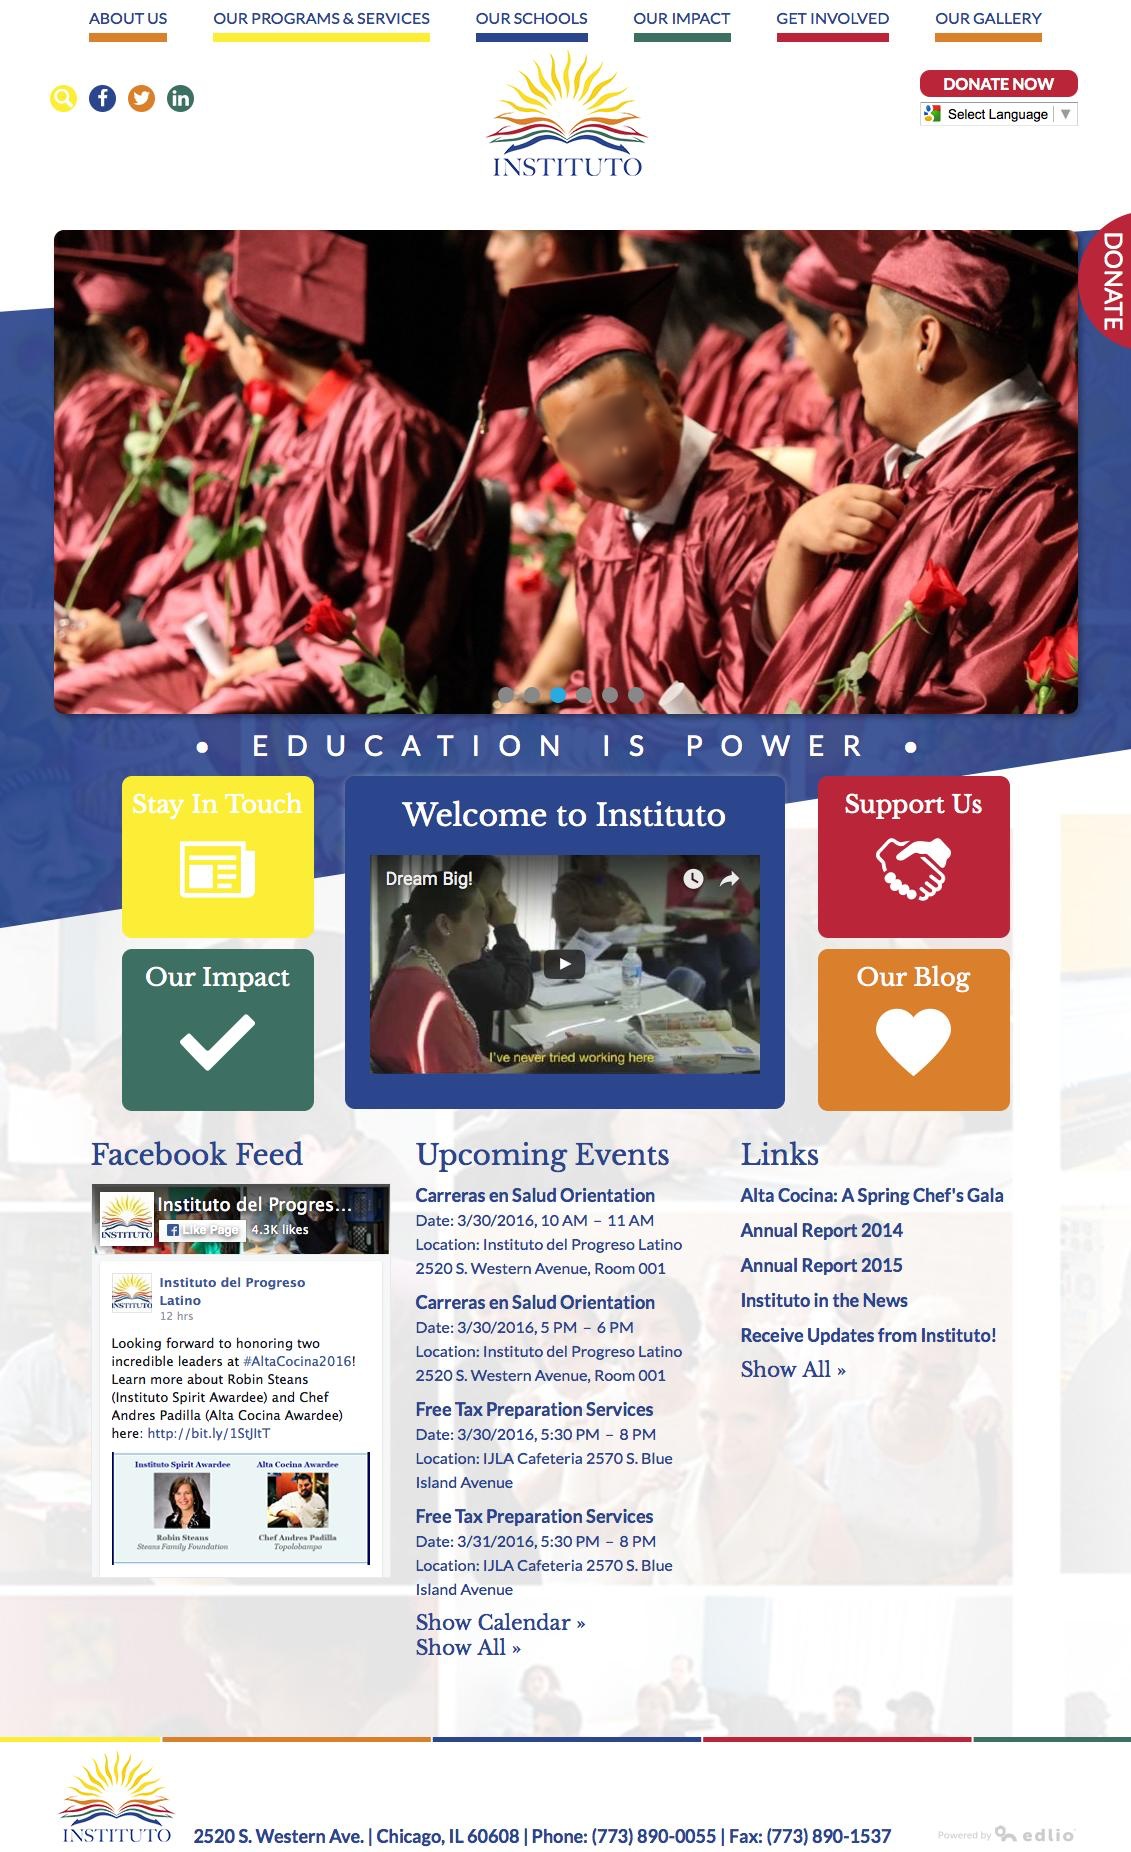


Acculturation-Education category-Instituto del Progreso Latino


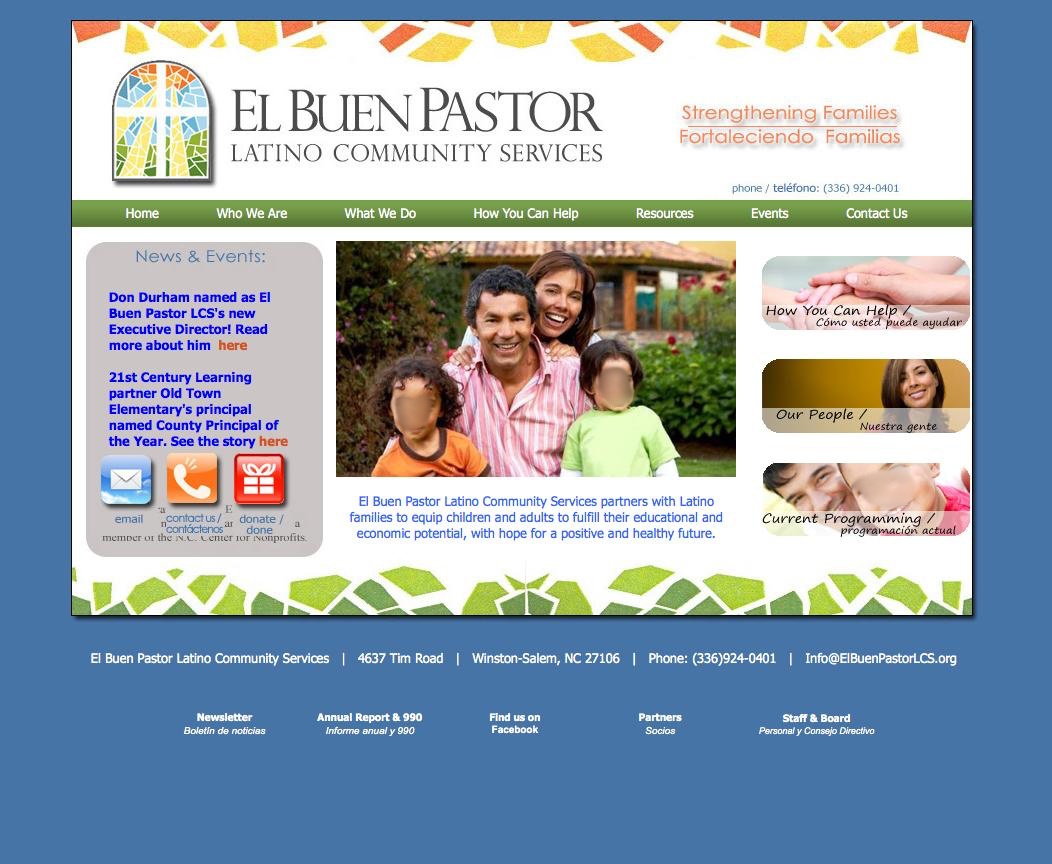


Acculturation-Family category-El Buen Pastor Latino Community Services


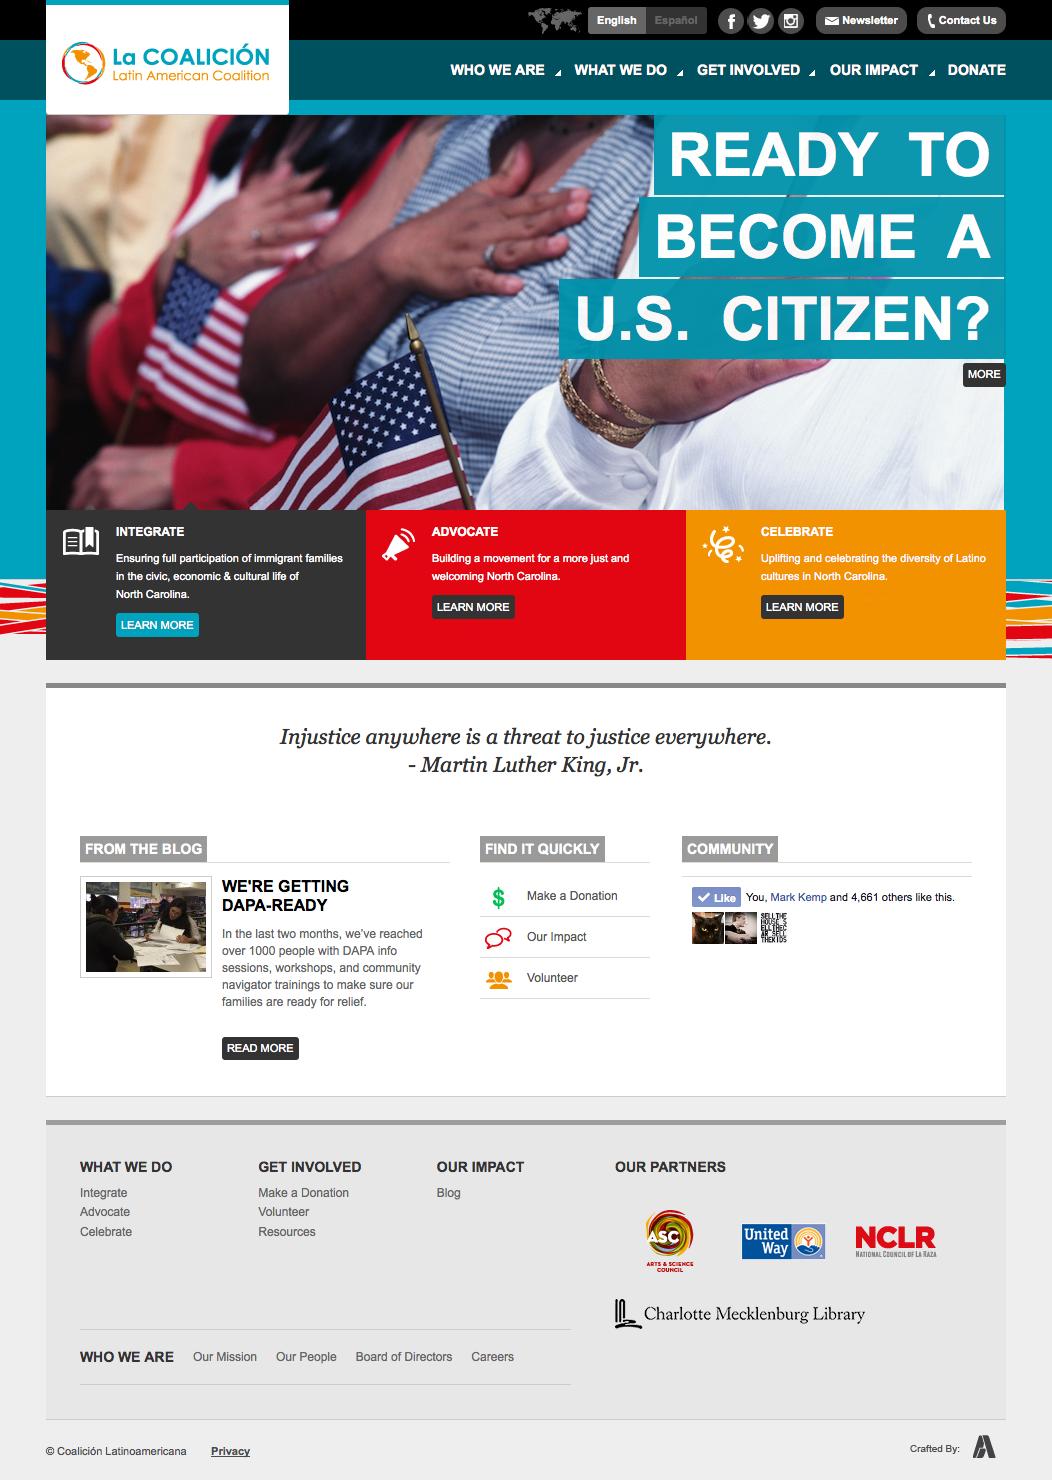


Acculturation-Citizenship category-Latin American Coalition


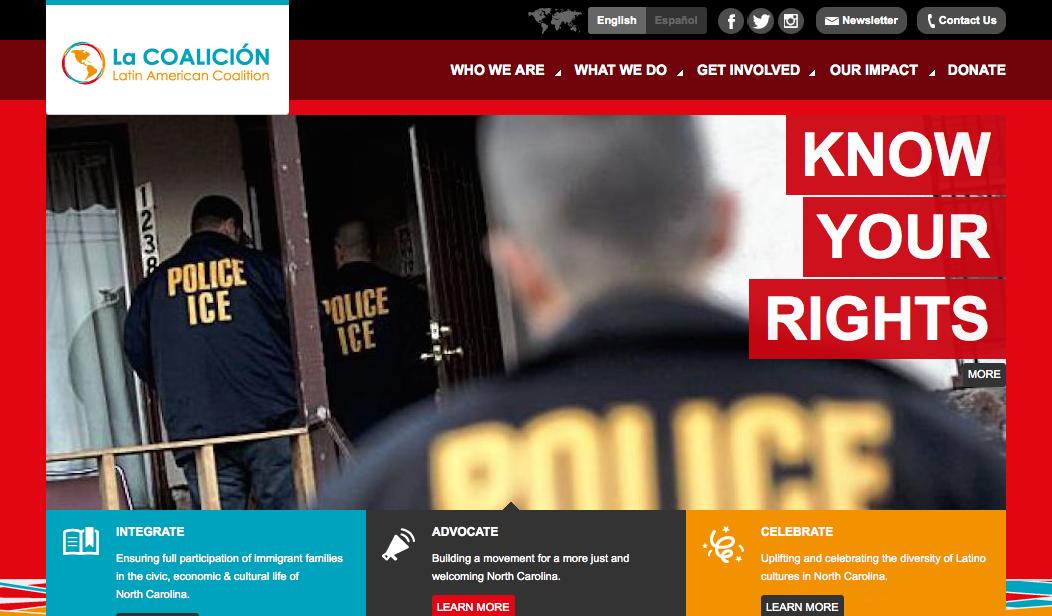


Pluralism-Resistance-Illegal category-Latin American Coalition


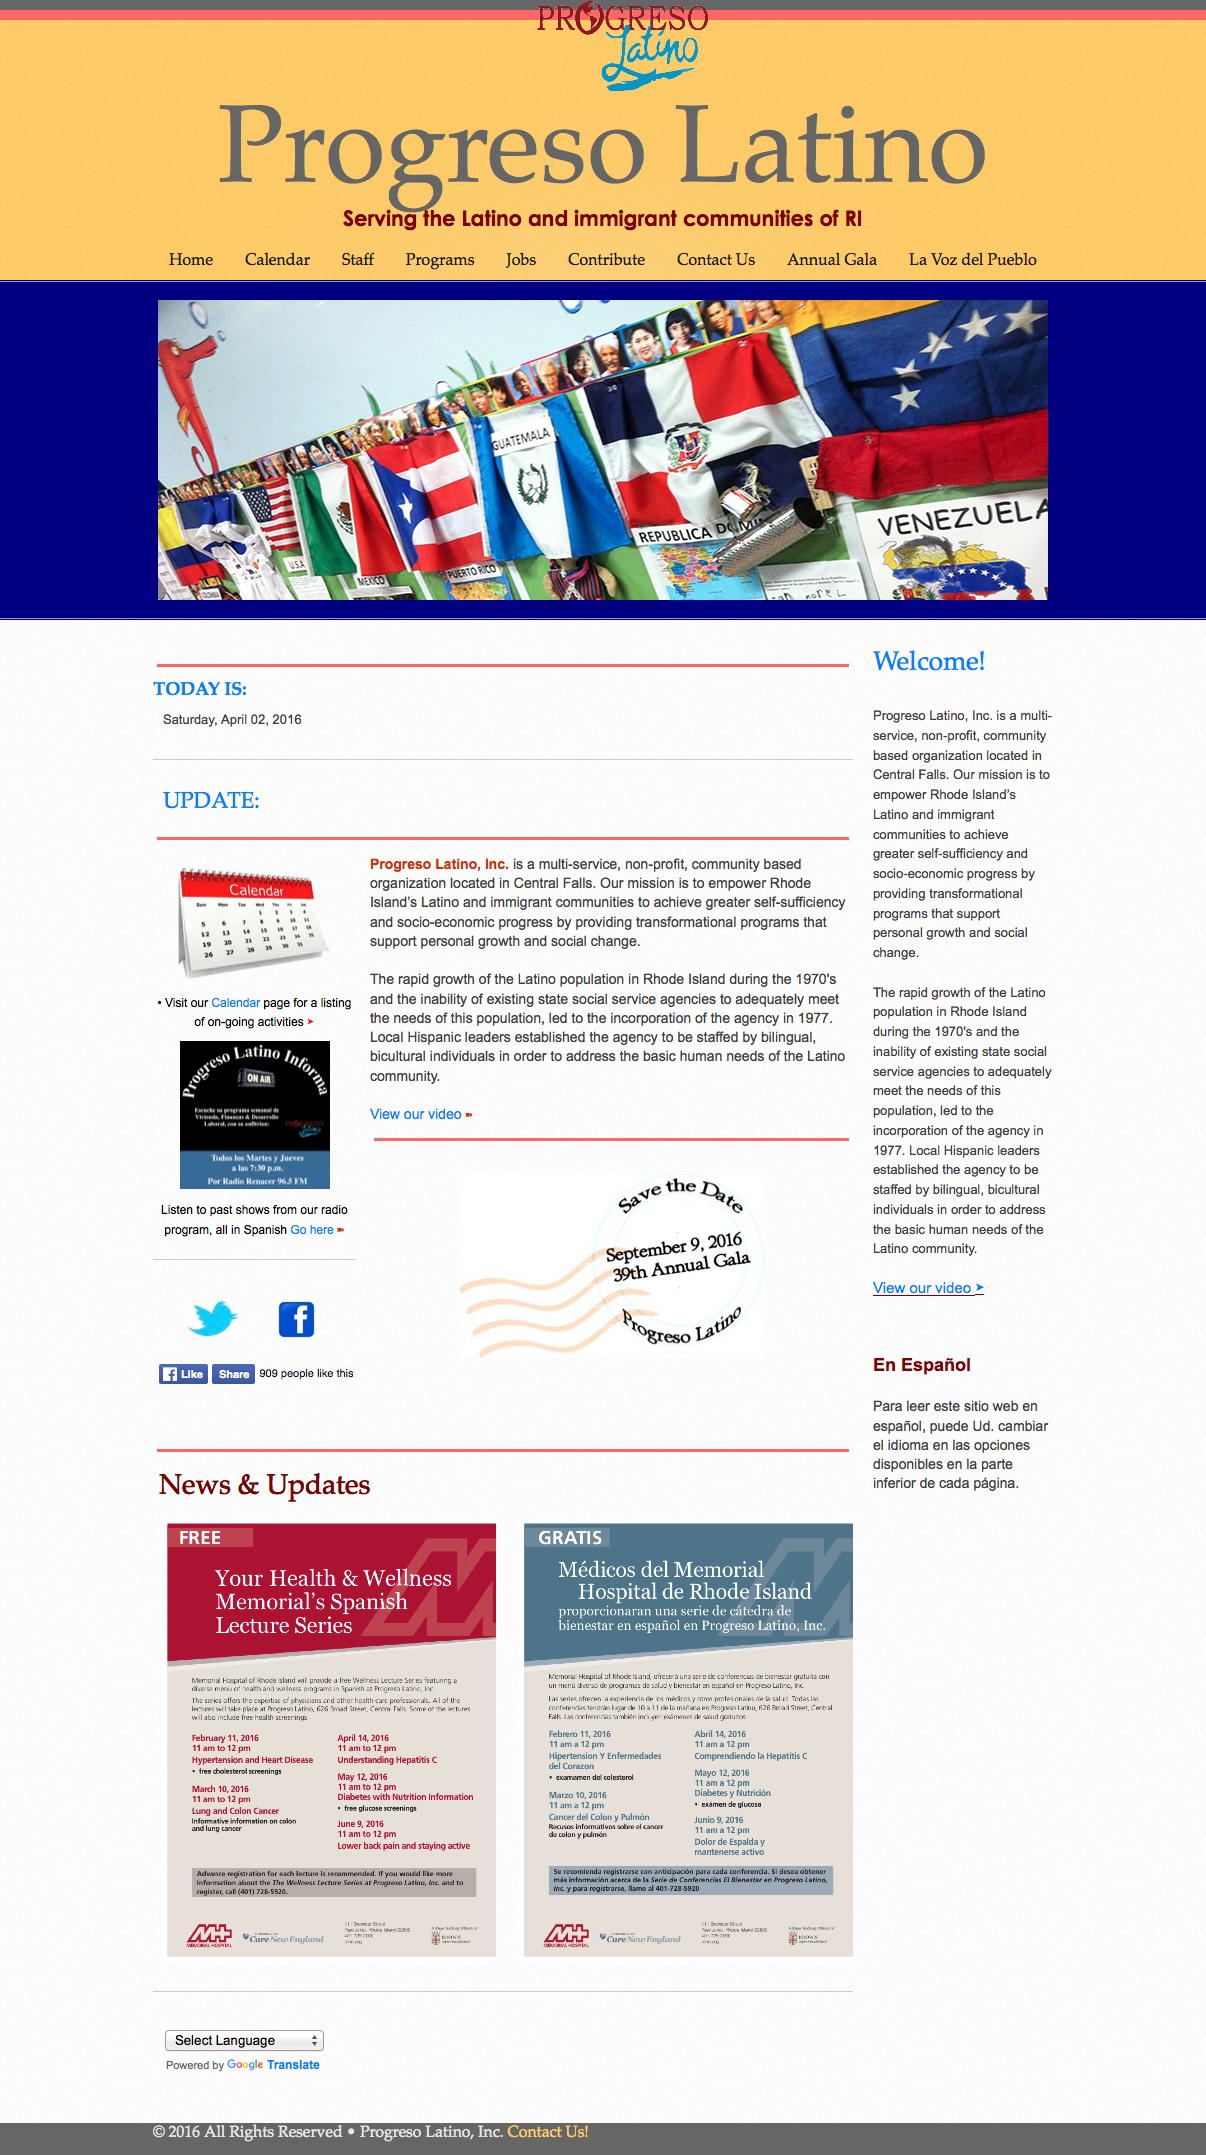


Pluralism-Empowerment category-Progresso Latino
